# Supplementary material for: Evolutionarily conserved sperm factors, DCST1 and DCST2, are required for gamete fusion
Source: eLife. 2021 Apr 19;10:e66313. doi: 10.7554/eLife.66313 (PMC8055269; doi:10.7554/eLife.66313)
Supplement: Figure 2—source data 1. [file elife-66313-fig2-data1.xlsx]

## Sheet: Sheet1
	IVF assay
	(%)
	Spaca6+/- sperm	Spaca6-/- sperm
1	100	0
2	100	0
3	80	0
4	91.3	0
