# Supplementary material for: Evolutionarily conserved sperm factors, DCST1 and DCST2, are required for gamete fusion
Source: eLife. 2021 Apr 19;10:e66313. doi: 10.7554/eLife.66313 (PMC8055269; doi:10.7554/eLife.66313)
Supplement: Figure 3—source data 1. [file elife-66313-fig3-data1.xlsx]

## Sheet: Fig. 3B
	Gamete fusion assay
	Dcst1/2+/- sperm	Dcst1/2-/- sperm
1	2	0
2	2	0
3	1	0
4	2	0
5	1	0
6	2	0
7	2	0
8	1	0
9	1	0
10	2	0
11	1	0
12	1	0
13	2	0
14	1	0
15	1	0
16	2	0
17	1	0
18	4	0
19	2	0
20	2	0
21	2	0
22	1	0
23	1	0
24	2	0
25	3	0
26	3	0
27	2	0
28	2	0
29	2	0
30	1	0
31	2	0
32	2	0
33	1	0
34	2	0
35	3	0
36	3	0
37	4	0
38	2	0
39	2	0
40	2	0
41	2	0
42	1	0
43	3	0
44	3	0
45	2	0
46	2	0
47	3	0
48	4	0
49	3	0
50	3	0
51	4	0
52	5	0
53	4	0
54	2	0
55	3	0
56	4	0
57	1	0
58	1	0
59	2	0
60	2	0
61	2	0
62	1	0
63	2	0
64	3	0
65	1	0
66	2	0
67	1	0
68	1	0
69	1	0
70	1	0
71	1	0
72	2	0
73	2	0
74	3	0
75	2	0
76	1	0
77	1	0
78		0
79		0
80		0

## Sheet: Fig. 3D
	IVF assay
	(%)
	Dcst1/2+/- sperm	Dcst1/2-/- sperm	Dcst1+/- sperm	Dcst1-/- sperm	Dcst2+/- sperm	Dcst2-/- sperm	Dcst1/2-/-Dcst1-TG	Dcst1/2-/-Dcst2-TG	Dcst1/2-/-Dcst1/2-TG
1	80	0	74	14.5	100	0	0	0	81.8
2	75	0	60	0	100	0	0	0	96.2
3	72	0	94.4	0	85.7	0	0	0	82.4
4	72	0	93.5	0	100	0	0	0	80
5	80.7	0	100	3.6	73.5	0	0	0	83.3
6			100	0	80	0	0	0	80
7				5.3	72.2	1.8
8					94.1	4.7

## Sheet: Fig. 3E
	Litter size
	Dcst1/2-/- female	Dcst1/2+/- male	Dcst1/2-/- male	Dcst1+/- male	Dcst1-/- male	Dcst2+/- male	Dcst2-/- male	Dcst1/2+/-Dcst1-TG male	Dcst1/2-/-Dcst1-TG male	Dcst1/2+/-Dcst2-TG male	Dcst1/2-/-Dcst2-TG male	Dcst1/2-/-Dcst1/2-TG male
1	7	10	0	8	0	5	0	8	0	9	0	6
2	8	10	0	7	0	5	0	9	0	6	0	12
3	7	12	0	6	0	10	0	9	0	7	0	5
4	7	11	0	5	0	9	0	9	0	10	0	12
5	7	8	0	5	0	7	0	9	0	6	0	8
6	7	7	0	10	0	11	0	11	0	8	0	9
7	9	12	0	9	0	7	0	5	0	9	0	8
8	7	11	0	9	0	6	0	8	0	8	0	8
9	10	7	0	7	0	7	0	8	0	9	0	7
10	9	6	0	8	0	9	0	7	0	12	0	9
11	9	11	0	8	0	8	0	7	0	9	0	7
12	10	10	0	8	0	9	0	8	0	8	0	12
13	12		0	5	0	10	0	8	0	8	0	8
14	7		0	11	0	7	0	6	0	11	0	10
15	9		0	13	0	10	0	8	0		0
16	7			7		6		8
17	8			7		5		9
18				8		6		7
19				7		6		11
20				7				5
21				8				9
22								9
23								9
24								8
25								8
26								10
27								9
28								7
29								8
30								9
31								9
32								10
